# Supplementary material for: Theranostic Tripartite Cancer Terminator Virus for Cancer Therapy and Imaging
Source: MDPI journal article supplement (doi:10.3390/cancers13040857), 2021-02-18
Supplement: s1 [file s1]

Supplementary materials

# Theranostic Tripartite Cancer Terminator Virus for Cancer Therapy and Imaging

Praveen Bhoopathi <sup>1,†,\*</sup>, Anjan K. Pradhan <sup>1,†</sup>, Santanu Maji <sup>1</sup>, Swadesh K. Das <sup>1,2,3</sup>, Luni Emdad <sup>1,2,3</sup> and Paul B. Fisher <sup>1,2,3,\*</sup>

<sup>1</sup> Department of Human and Molecular Genetics, Virginia Commonwealth University, School of Medicine, Richmond, VA 23298, USA; anjan.pradhan@vcuhealth.org (A.K.P.); santanu.maji@vcuhealth.org (S.M.); swadesh.das@vcuhealth.org (S.K.D.); luni.emdad@vcuhealth.org (L.E.)

<sup>2</sup> VCU Institute of Molecular Medicine, Virginia Commonwealth University, School of Medicine, Richmond, VA 23298, USA

<sup>3</sup> VCU Massey Cancer Center, Virginia Commonwealth University, School of Medicine, Richmond, VA 23298, USA

\* Correspondence: paul.fisher@vcuhealth.org (P.B.F.); praveen.bhoopathi@vcuhealth.org (P.B.)

† Contributed equally.

## Supplementary materials

**Citation:** Bhoopathi, P.; Pradhan, A.K.; Maji, S.; Das, S.K.; Emdad, L.; Fisher, P.B. Theranostic Tripartite Cancer Terminator Virus for Cancer Therapy and Imaging. *Cancers* **2021**, *13*, x. <https://doi.org/10.3390/xxxxx>

Academic Editor:

Received: 24 December 2020

Accepted: 15 February 2021

Published: date

**Publisher's Note:** MDPI stays neutral with regard to jurisdictional claims in published maps and institutional affiliations.

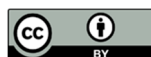

**Copyright:** © 2020 by the authors.

Submitted for possible open access publication under the terms and conditions of the Creative Commons Attribution (CC BY) license (<http://creativecommons.org/licenses/by/4.0/>).

Supplementary Fig 1

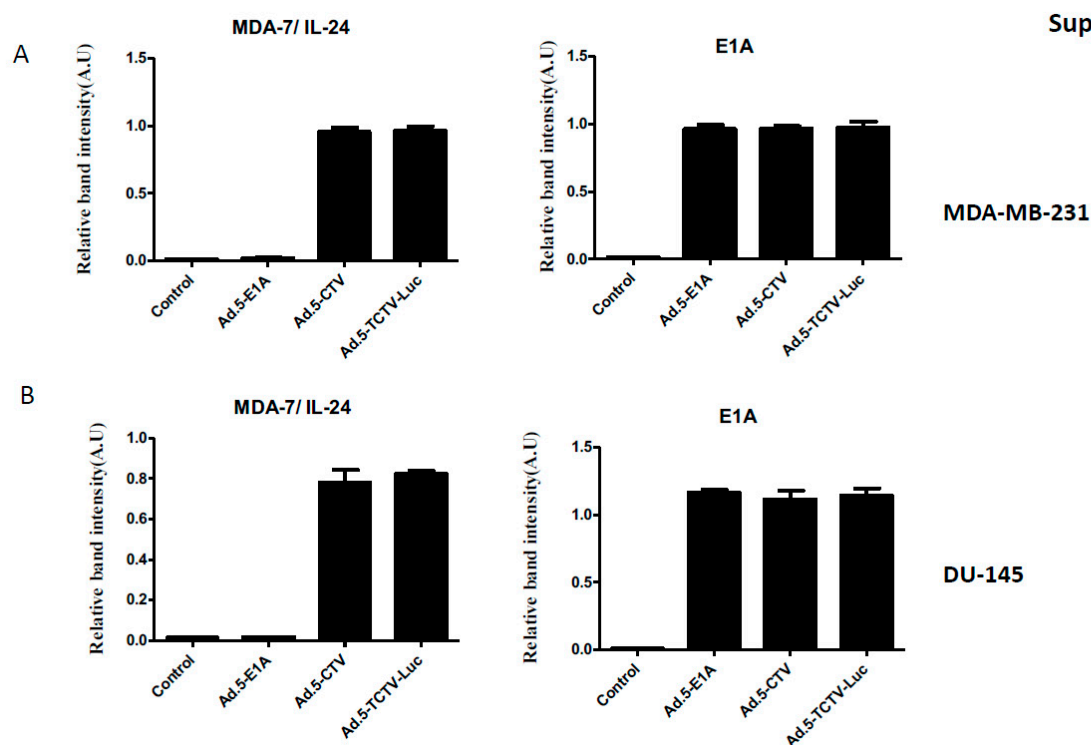

Figure S1. (A) Densitometry analysis of Western blots in figure 1D left panel, (B) right panel.

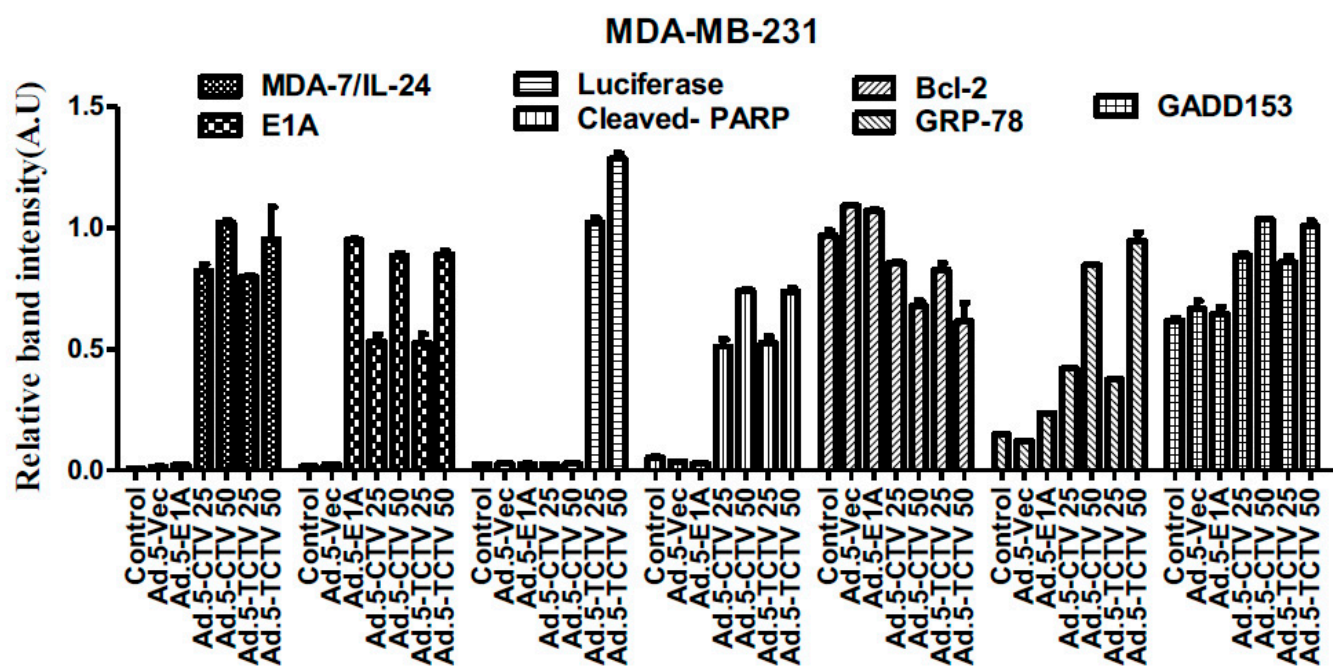

(A)

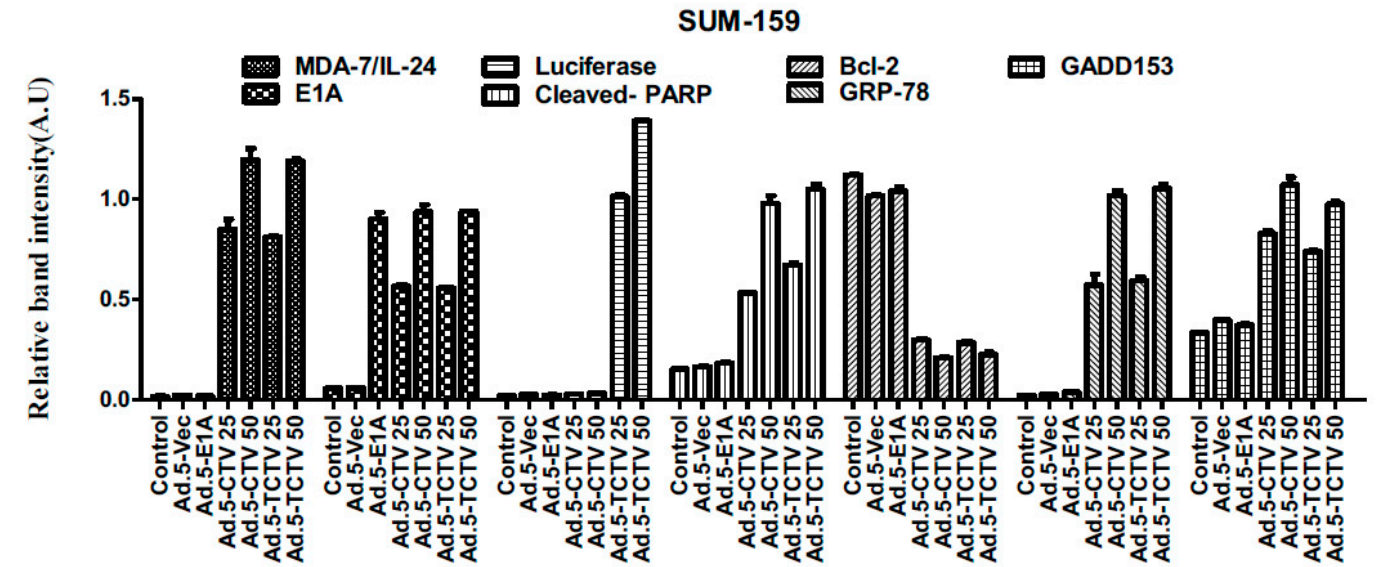

(B)

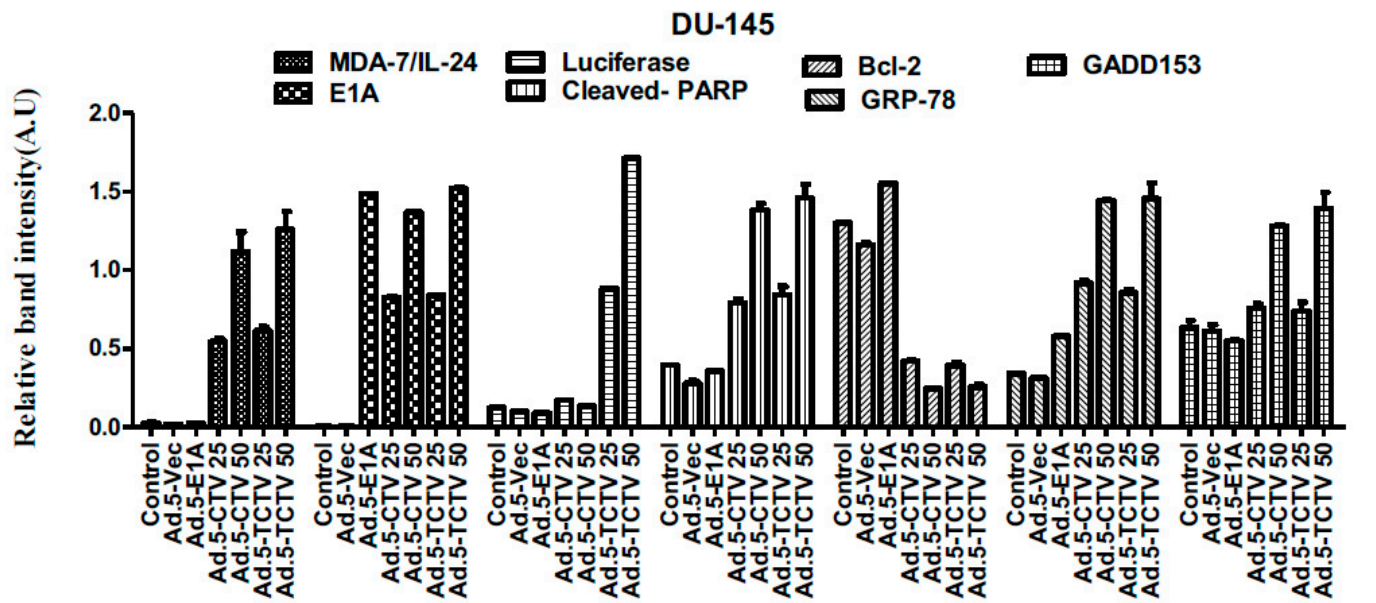

(C)

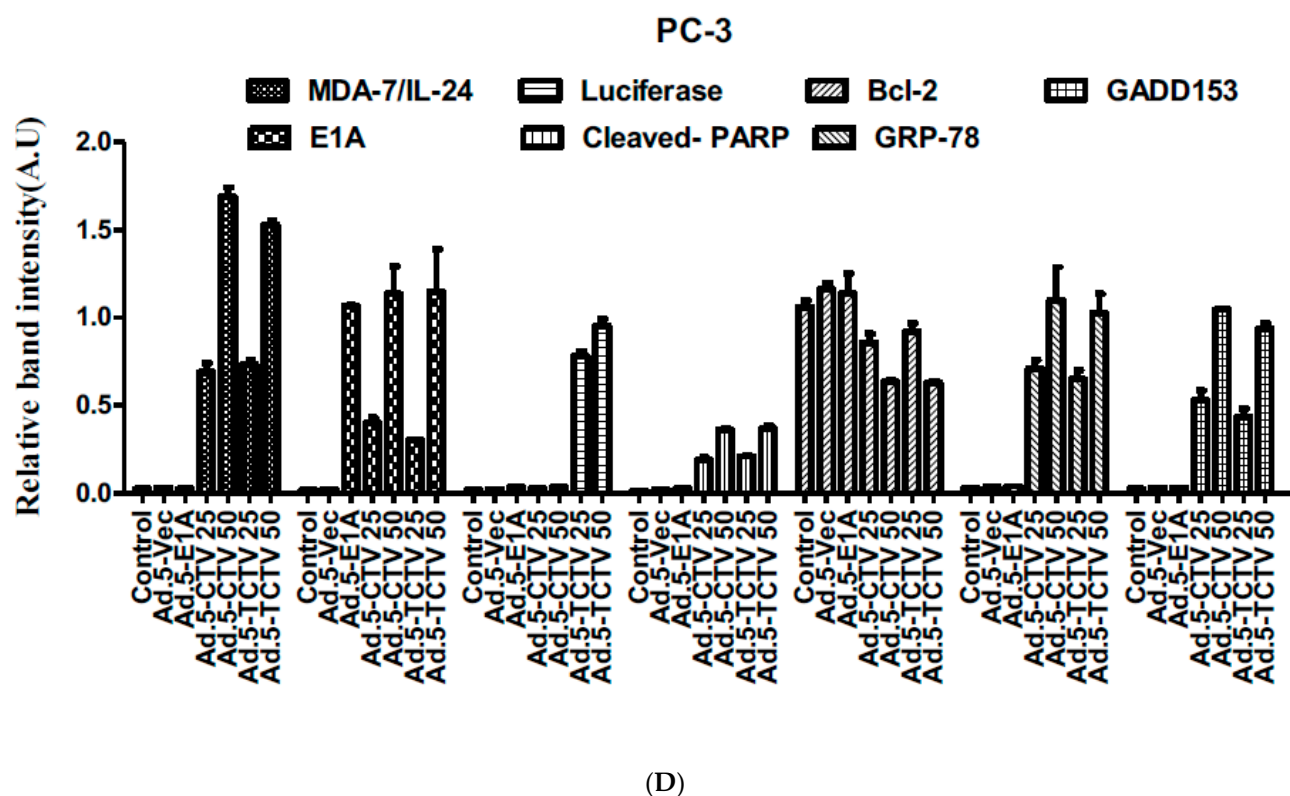

**Figure S2.** (A) Densitometry analysis of Western blots in figure 3A left panel, (B) Densitometry analysis of Western blots in figure 3A right panel, (C) Densitometry analysis of Western blots in figure 3C left panel, (D) Densitometry analysis of Western blots in figure 3C right panel.

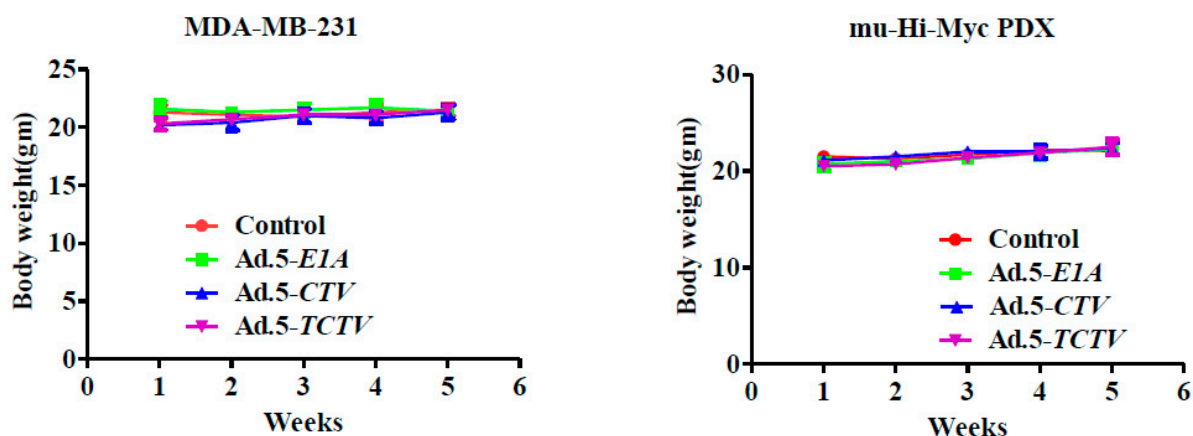

**Figure S3.** Ad.5-E1A, Ad.5-CTV or Ad.5-TCTV did not cause any significant alterations in the body weight of treated animals as compared to control group.

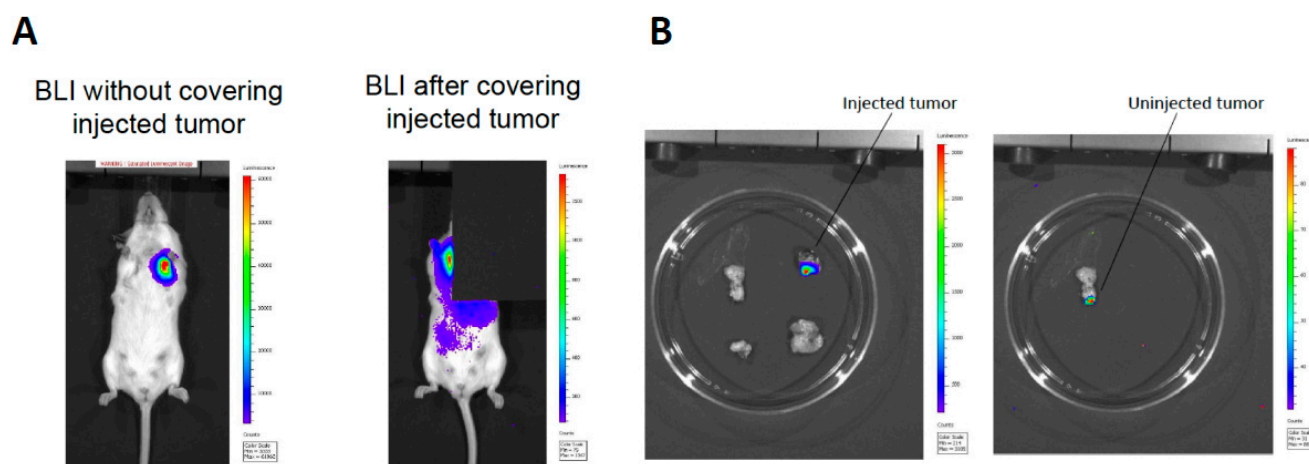

**Figure S4.** Injection of a single tumor can light up an adjacent tumor within the same mouse in MMTV-PyMT model. **(A)** Representative bioluminescent images showing both injected and uninjected tumors being visualized using bioluminescent imaging. **(B)** Representative bioluminescent images of the dissected tumors *in vitro*.

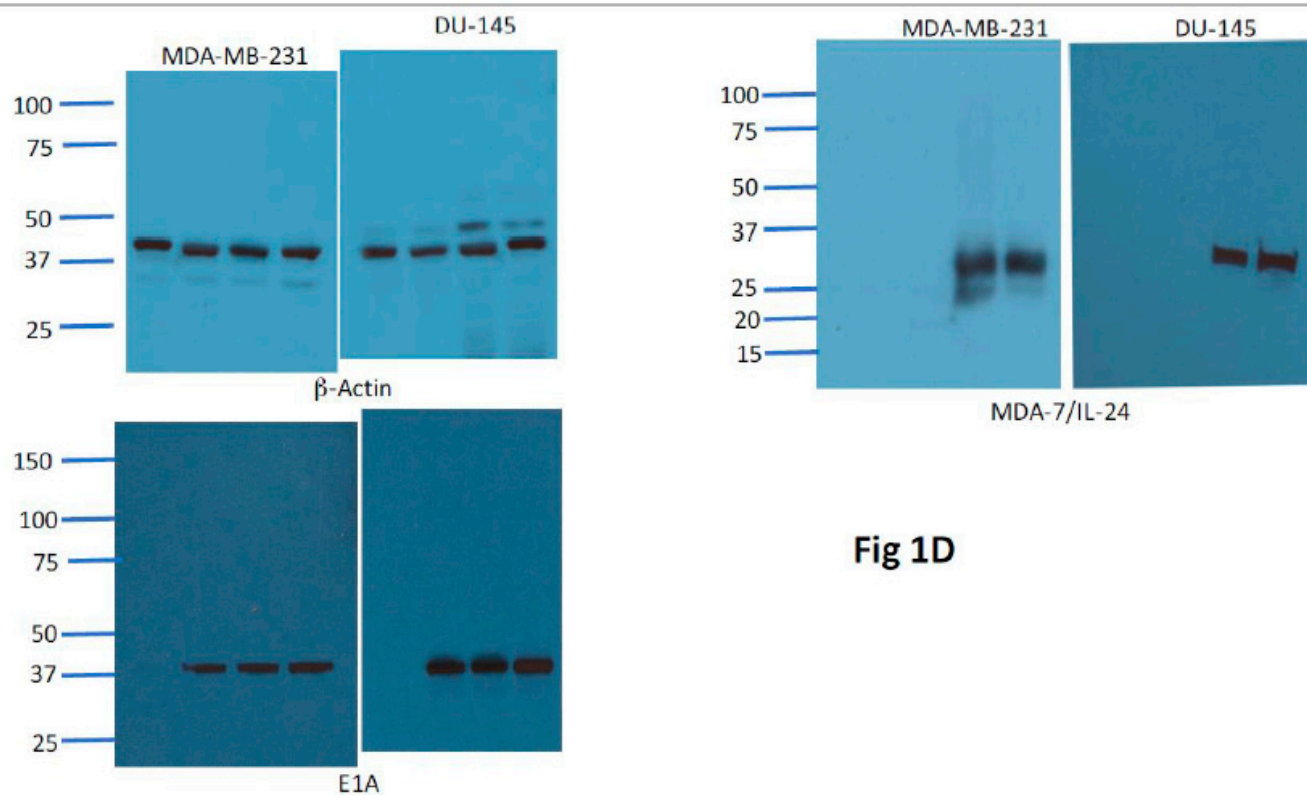

**Fig 1D**



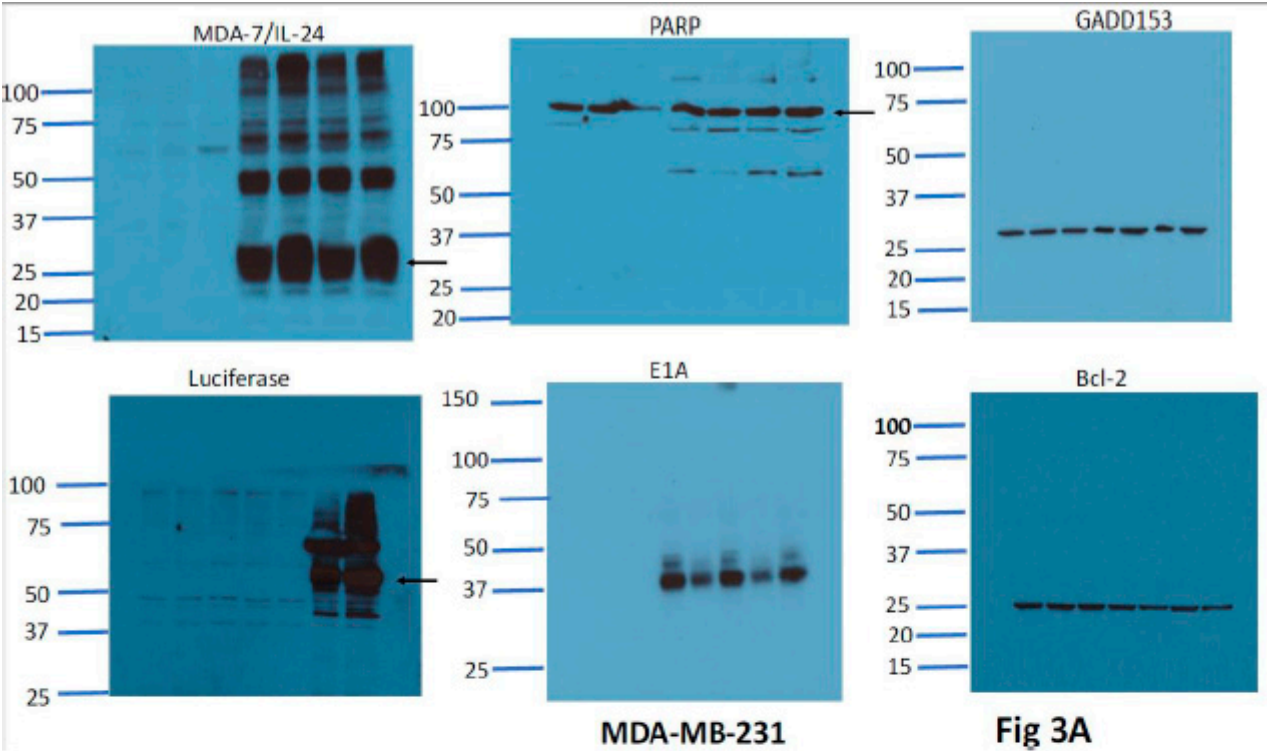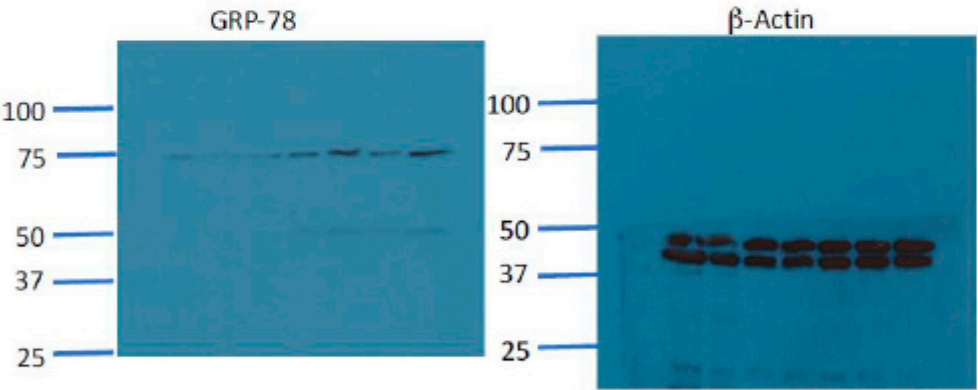

Fig 3A

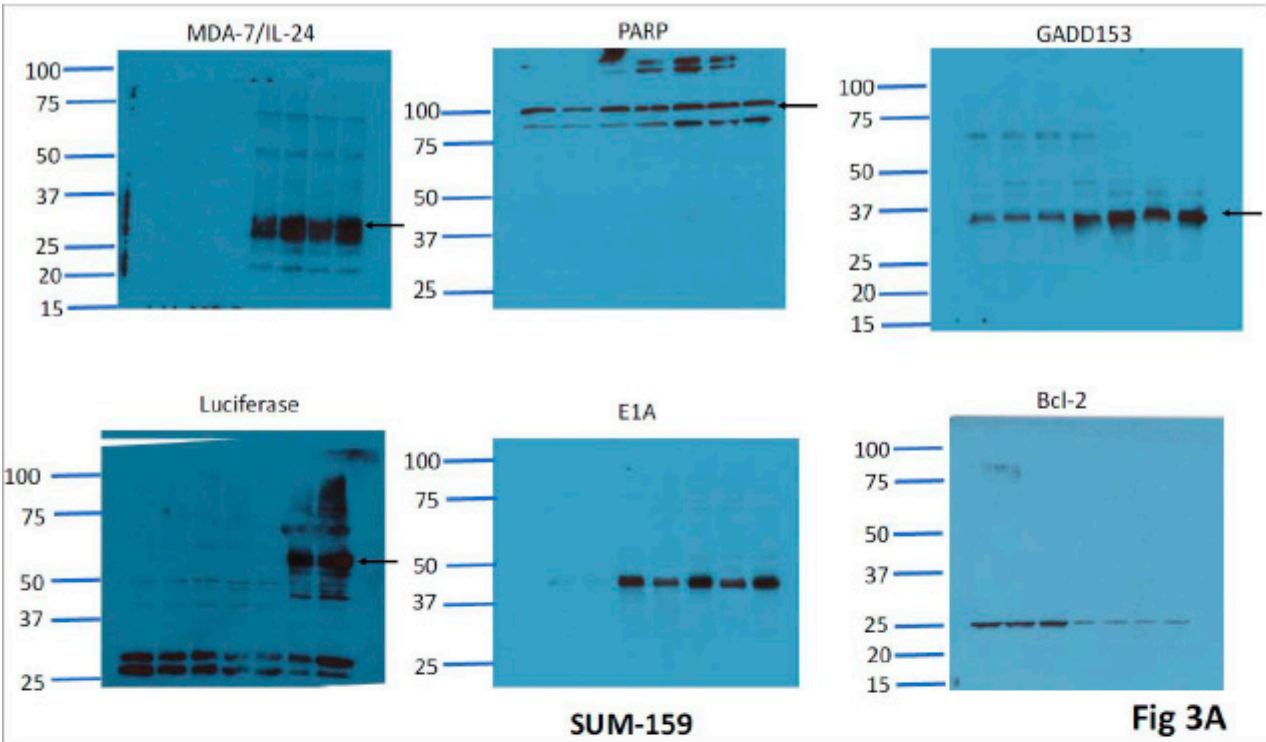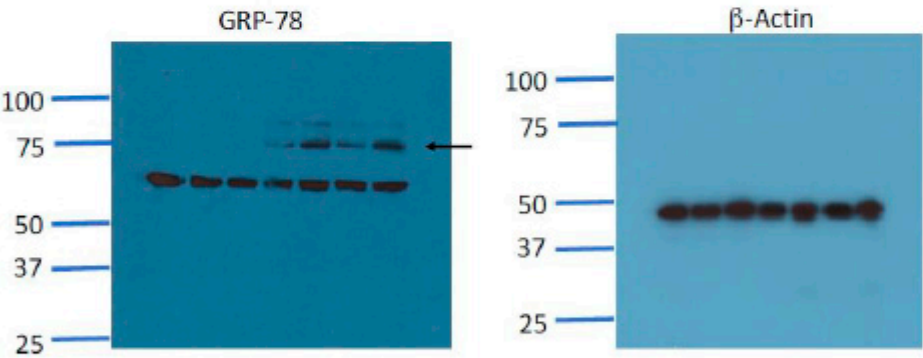

Fig 3A

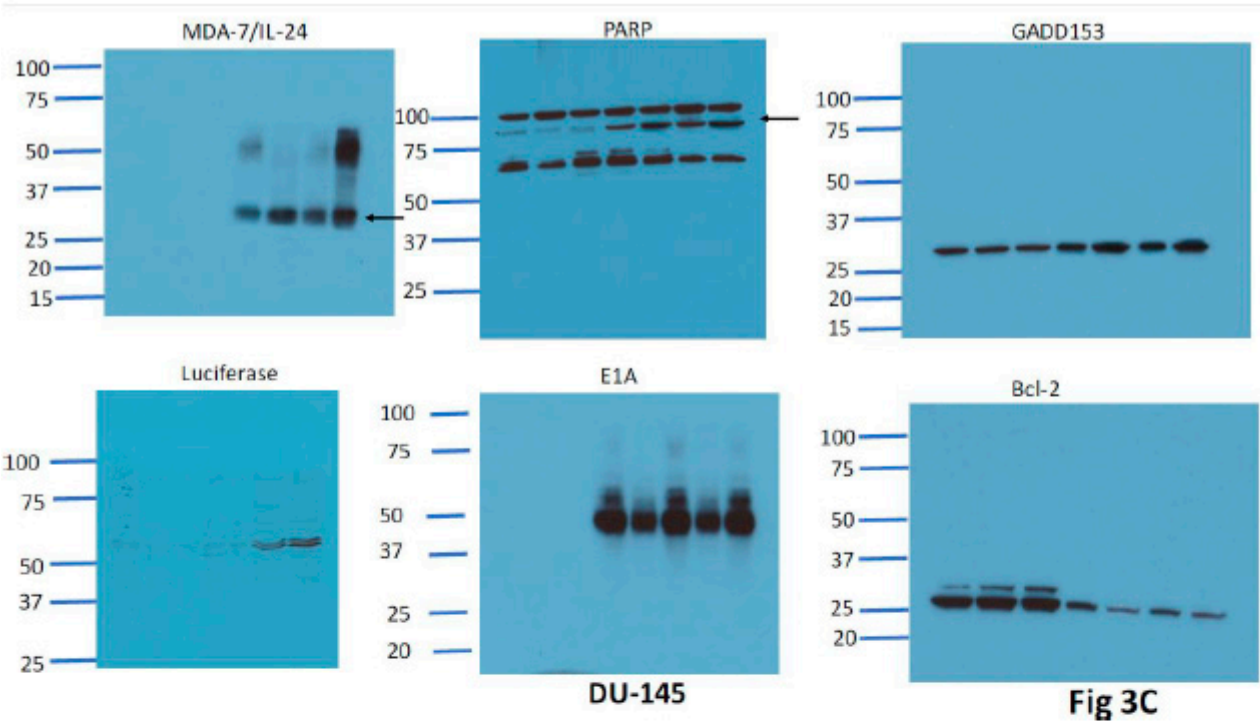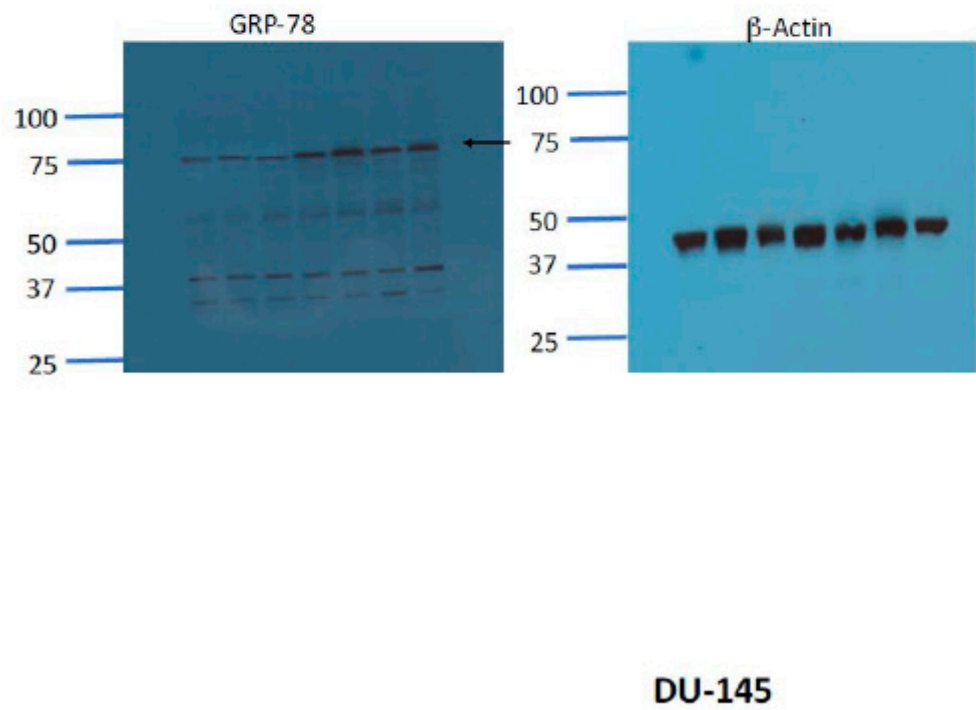

Fig 3A



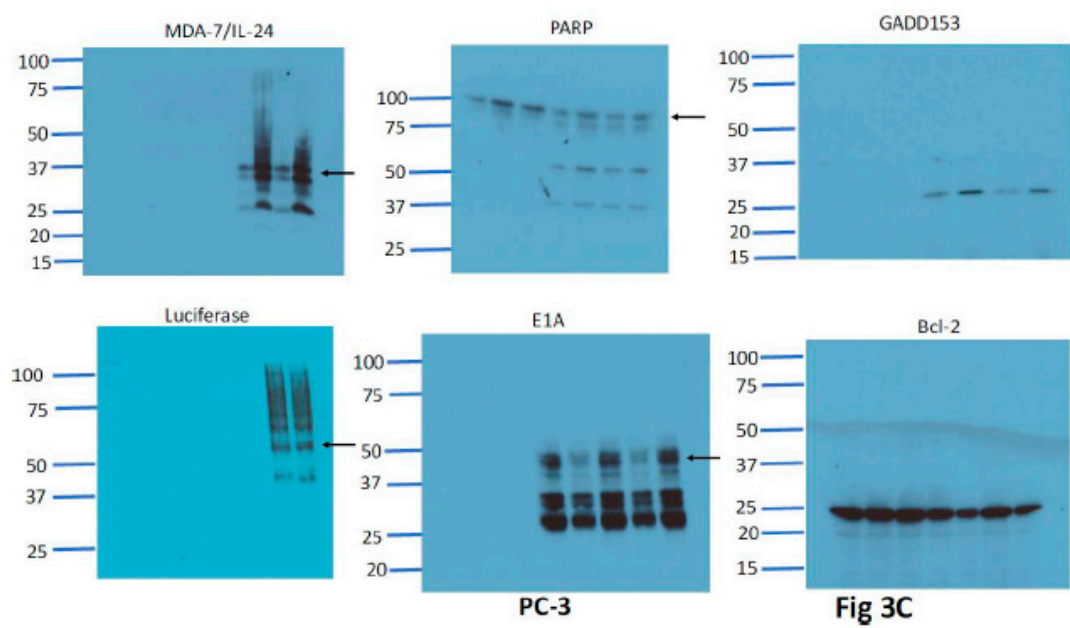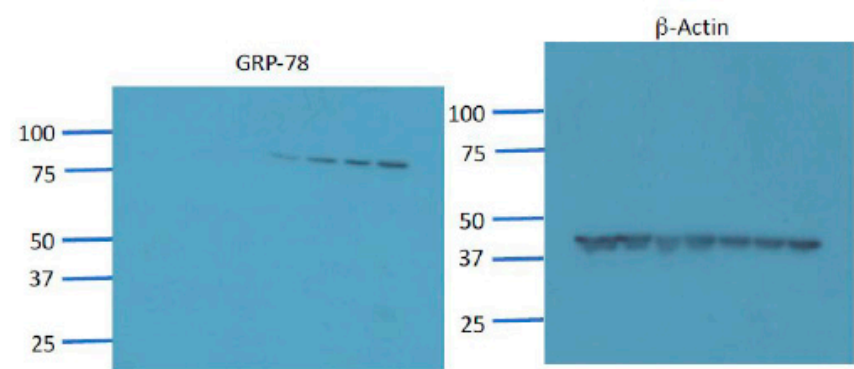

Fig 3C
